# Supplementary material
Source: PubMed Central journal article supplement (PMC9583596)
Supplement: NIHMS1840961-supplement-1.pdf [file NIHMS1840961-supplement-1.pdf]

## Supplementary information:

Supplementary Table 1. Demographic and clinical information for patients with disorders of consciousness

| Patient number | Gender/Age | Cause  | Time of fMRI (days after insult) | CRS-R | Diagnosis |
|----------------|------------|--------|----------------------------------|-------|-----------|
| UWS1           | M/51       | TBI    | 100                              | 4     | UWS       |
| UWS2           | F/35       | TBI    | 21                               | 5     | UWS       |
| UWS3           | M/60       | SIH    | 109                              | 6     | UWS       |
| UWS4           | M/44       | TBI    | 21                               | 3     | UWS       |
| UWS5           | M/50       | TBI    | 137                              | 3     | UWS       |
| UWS6           | M/46       | SIH    | 18                               | 2     | UWS       |
| UWS7           | M/24       | TBI    | 15                               | 6     | UWS       |
| UWS8           | M/38       | TBI    | 81                               | 3     | UWS       |
| UWS9           | M/46       | TBI    | 25                               | 2     | UWS       |
| UWS10          | F/67       | TBI    | 10                               | 3     | UWS       |
| UWS11          | F/39       | TBI    | 31                               | 6     | UWS       |
| UWS12          | F/52       | SIH    | 51                               | 4     | UWS       |
| UWS13          | M/46       | TBI    | 162                              | 5     | UWS       |
| UWS14          | M/17       | TBI    | 16                               | 3     | UWS       |
| UWS15          | F/43       | SIH    | 162                              | 6     | UWS       |
| UWS16          | M/24       | Anoxic | 5                                | 3     | UWS       |
| UWS17          | F/57       | TBI    | 15                               | 3     | UWS       |
| UWS18          | F/24       | TBI    | 1                                | 3     | UWS       |
| UWS19          | M/46       | Anoxic | 23                               | 3     | UWS       |
| UWS20          | M/62       | TBI    | 24                               | 4     | UWS       |
| UWS21          | M/45       | TBI    | 12                               | 6     | UWS       |
| UWS22          | M/39       | SIH    | 221                              | 4     | UWS       |
| UWS23          | M/57       | SIH    | 33                               | 2     | UWS       |
| MCS1           | M/18       | TBI    | 30                               | 6     | MCS       |
| MCS2           | F/32       | TBI    | 73                               | 12    | MCS       |
| MCS3           | M/49       | TBI    | 24                               | 9     | MCS       |
| MCS4           | M/16       | TBI    | 4                                | 12    | MCS       |
| MCS5           | M/17       | TBI    | 44                               | 12    | MCS       |
| MCS6           | M/44       | TBI    | 98                               | 8     | MCS       |
| MCS7           | M/56       | TBI    | 18                               | 8     | MCS       |
| MCS8           | M/36       | TBI    | 82                               | 13    | MCS       |
| MCS9           | M/48       | TBI    | 19                               | 10    | MCS       |
| BL1            | M/46       | TBI    | 43                               | 23    | BL        |
| BL2            | M/18       | TBI    | 182                              | 23    | BL        |
| BL3            | M/70       | TBI    | 11                               | 23    | BL        |
| BL4            | F/52       | TBI    | 137                              | 23    | BL        |
| BL5            | M/24       | TBI    | 165                              | 23    | BL        |
| BL6            | M/18       | TBI    | 105                              | 23    | BL        |
| BL7            | F/29       | TBI    | 6                                | 23    | BL        |
| BL8            | M/49       | TBI    | 57                               | 23    | BL        |
| BL9            | F/33       | TBI    | 86                               | 19    | BL        |

|      |      |     |     |    |    |
|------|------|-----|-----|----|----|
| BL10 | M/21 | TBI | 621 | 23 | BL |
| BL11 | F/50 | SIH | 9   | 23 | BL |
| BL12 | M/46 | SIH | 41  | 23 | BL |
| BL13 | M/64 | SIH | 30  | 23 | BL |
| BL14 | F/33 | SIH | 4   | 23 | BL |
| BL15 | F/24 | TBI | 139 | 23 | BL |
| BL16 | F/54 | TBI | 4   | 23 | BL |
| BL17 | F/28 | TBI | 4   | 23 | BL |
| BL18 | M/34 | TBI | 4   | 23 | BL |

Note: UWS = unresponsive wakefulness syndrome, MCS = Minimally conscious state, BL = patients with brain lesions but full consciousness. CRS-R: Coma Recovery Scale-Revised; SIH: spontaneous intracerebral hemorrhage, TBI = traumatic brain injury.

Supplementary Table 2. Coordinates for global hubs with reduced degree centrality in unconsciousness

| Brain regions | Lateral | Coordinates (MNI) |     |    |
|---------------|---------|-------------------|-----|----|
|               |         | X                 | Y   | Z  |
| SACC          | M       | -2                | 6   | 41 |
| SMA           | M       | -2                | -14 | 52 |
| SMG           | L       | -59               | -24 | 21 |
|               | R       | 56                | -26 | 24 |
| MTG           | L       | -54               | -68 | 7  |

Note: The overlapped regions showing significantly reduced voxel-wise DC during all kinds of unconscious states (N3-sleep, anesthesia and unresponsive wakefulness syndrome). SACC = supragenual anterior cingulate cortex; SMA = supplementary motor area; SMG = supramarginal gyrus; LMTG = left middle temporal gyrus.

Supplementary fig. 1.

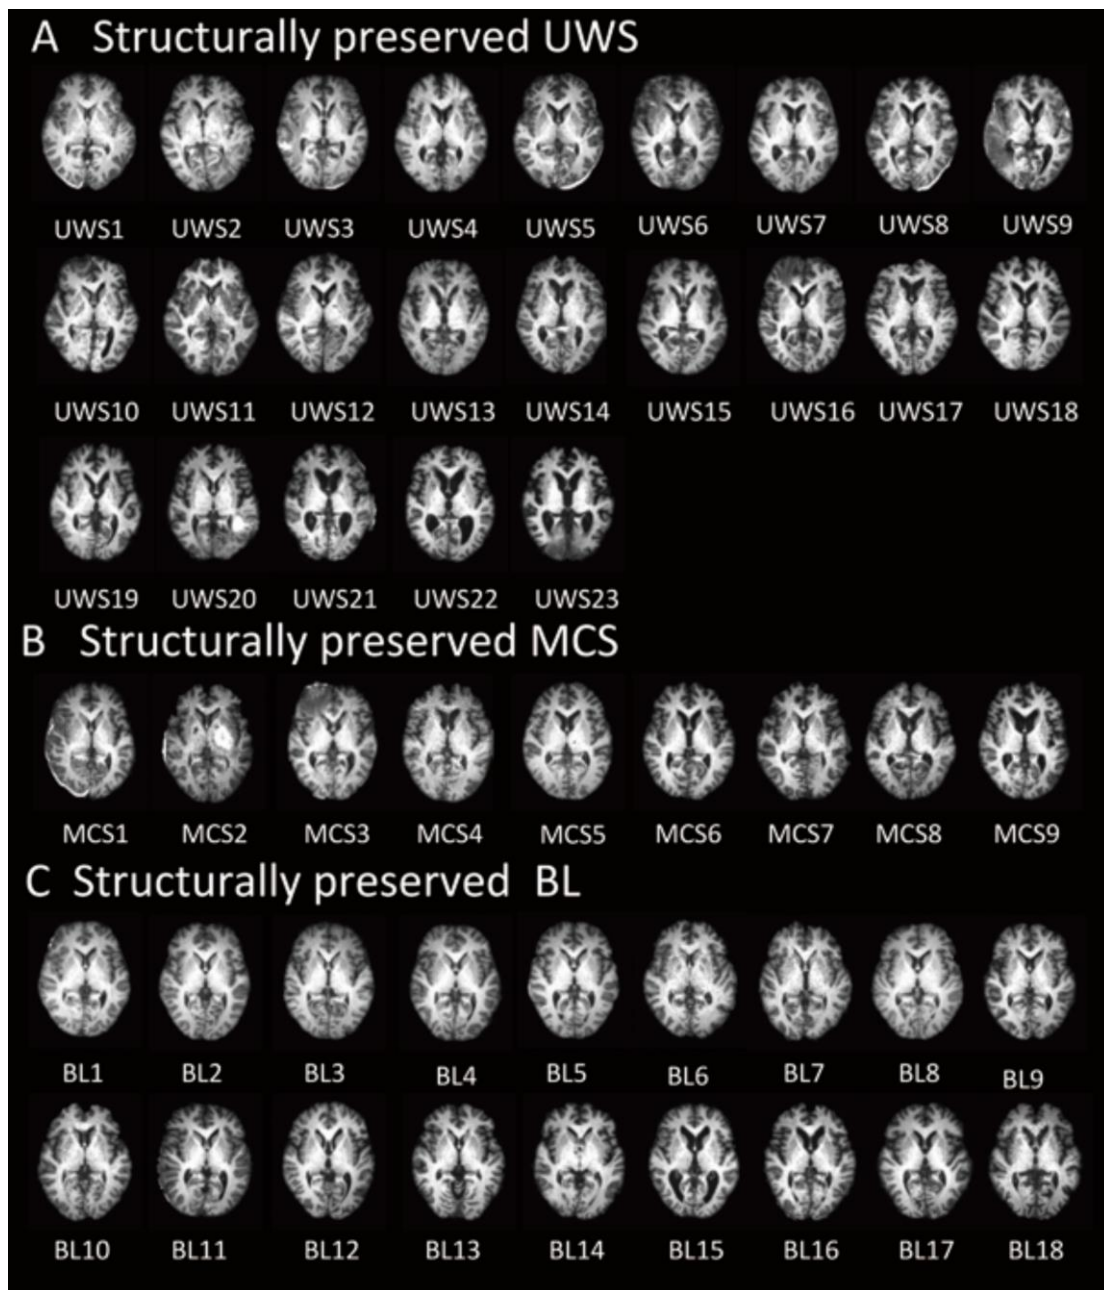

Supplementary fig. 1: Structure Image patients with disorders of consciousness. (A) UWS = unresponsive wakefulness syndrome, (B) MCS = minimally conscious state, (C) BL = patients with brain lesions but full consciousness.

Supplementary fig. 2.

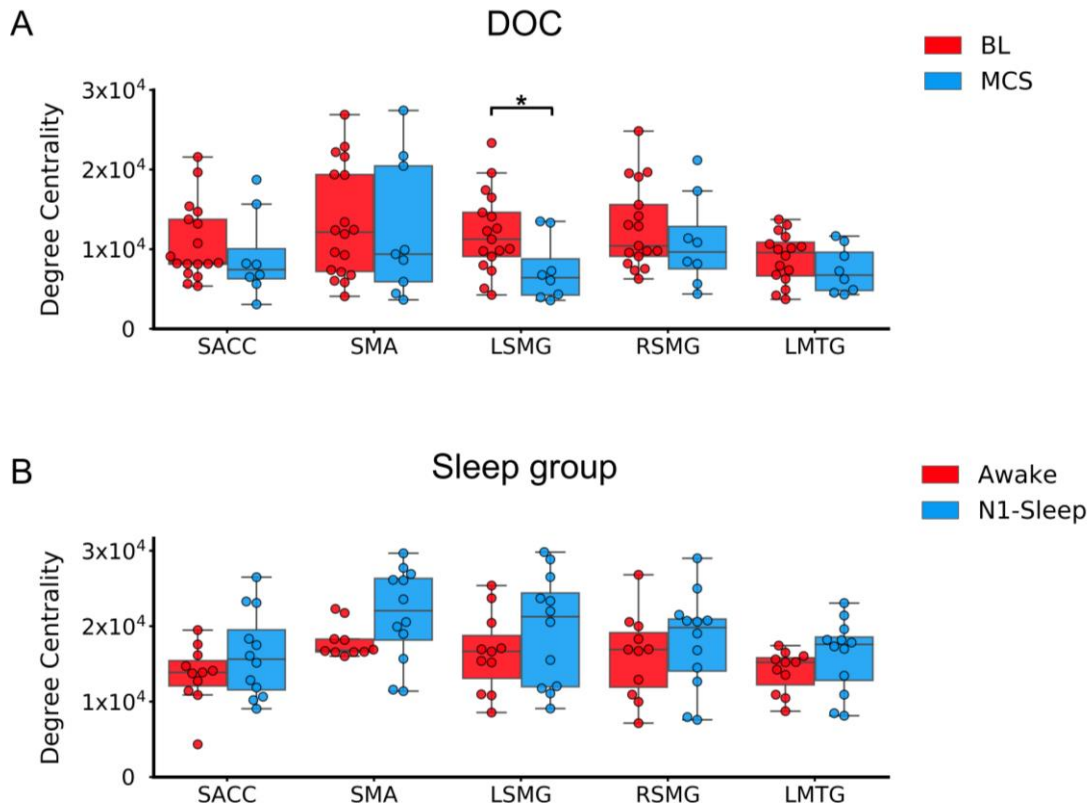

Supplementary fig. 2. The degree centrality in DOC and sleep group. (A) The degree centrality in BL and MCS in DOC group. (B) The degree centrality in Awake and N1-sleep. SACC = supragenual anterior cingulate cortex; SMA = supplementary motor area; LSMG = left supramarginal gyrus; RSMG = right supramarginal gyrus; LMTG = left middle temporal gyrus. \* means  $p < 0.05$  FDR corrected.

Supplementary fig. 3

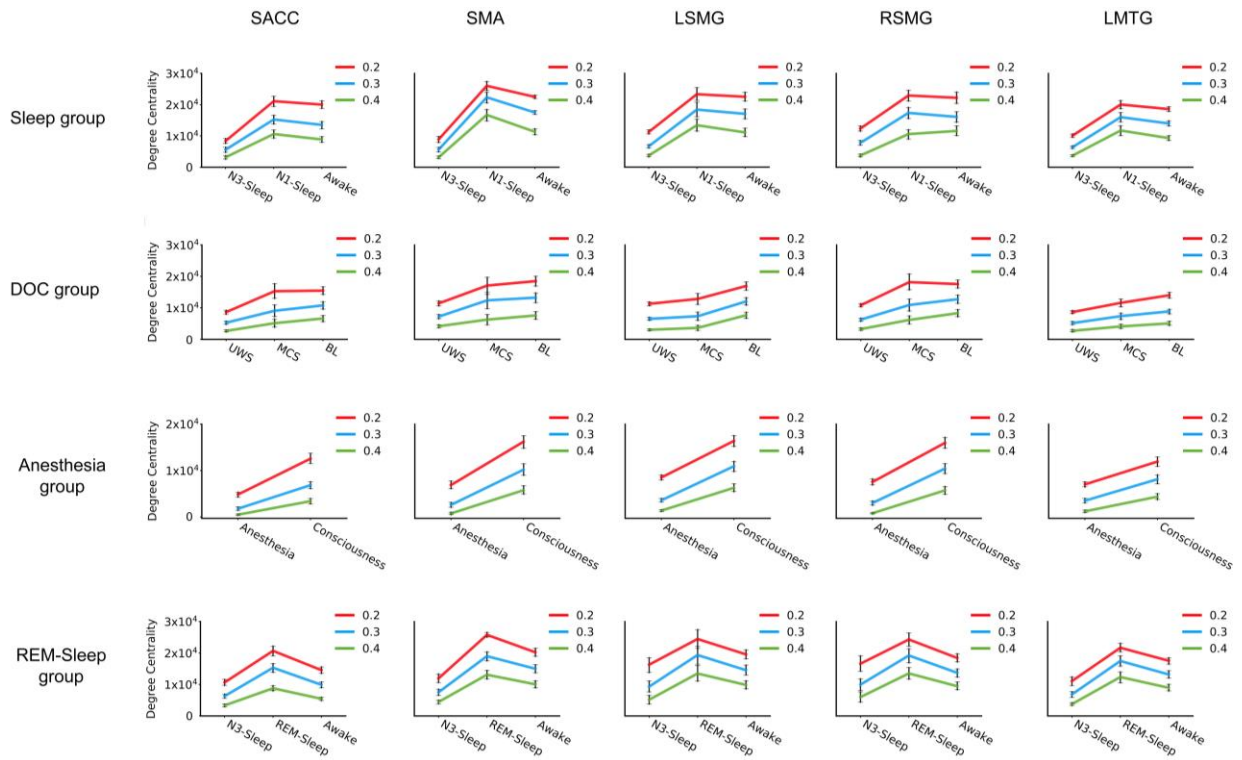

Supplementary fig. 3. The degree centrality values (with different thresholds) in global hubs.

0.3 means  $r > 0.3$ ; 0.2 means  $r > 0.2$ ; 0.4 means  $r > 0.4$ . SACC = supragenual anterior

cingulate cortex; SMA = supplementary motor area; LSMG = left supramarginal gyrus;

RSMG = right supramarginal gyrus; LMTG = left middle temporal gyrus.

Supplementary fig. 4.

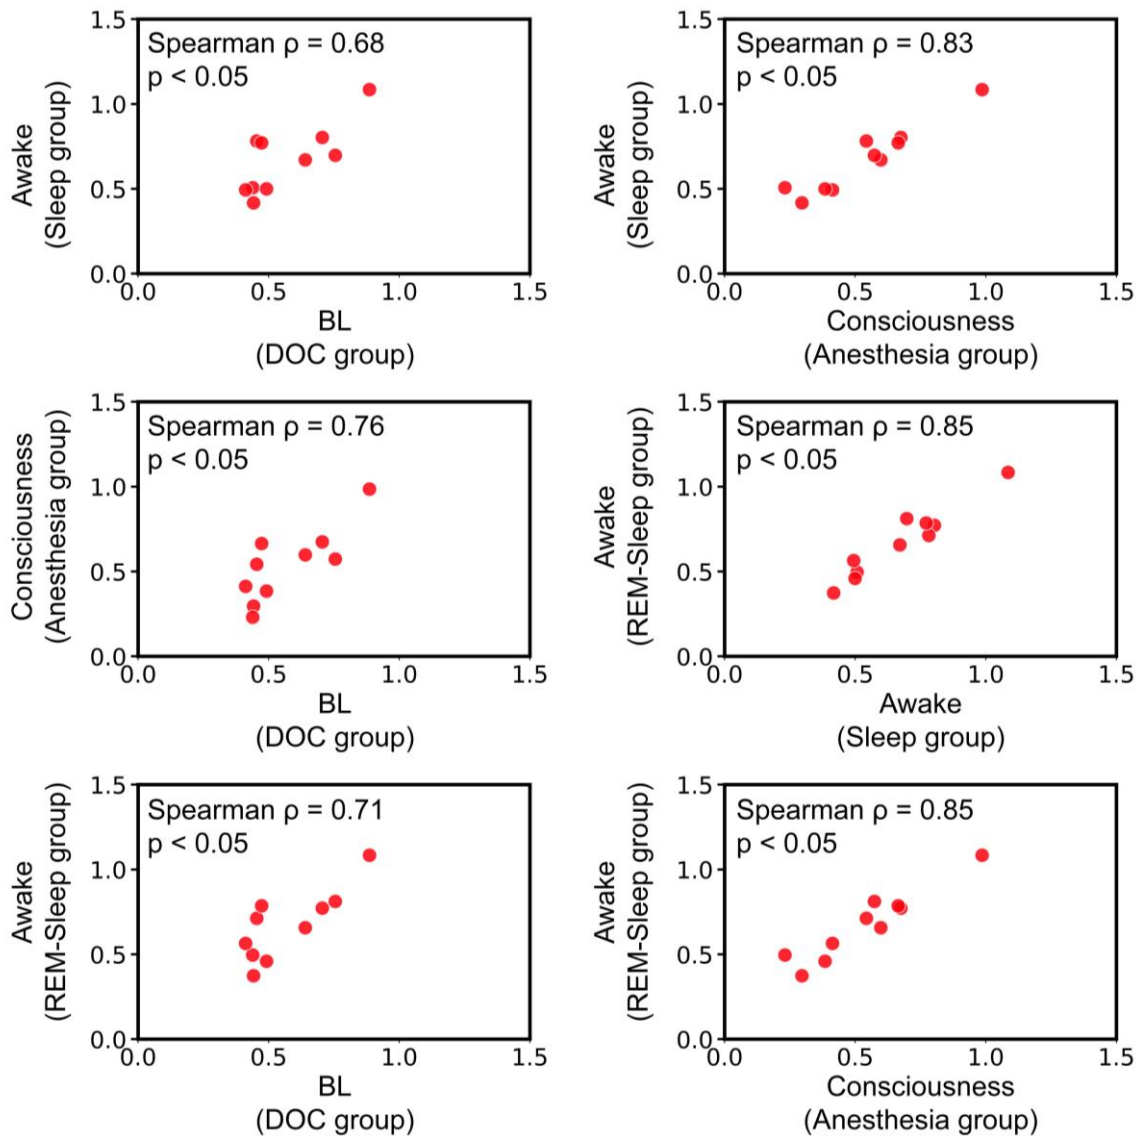

Supplementary fig. 4. The relationship of functional connectivity (FC) between each of pair of groups during conscious states.

Supplementary fig. 5.

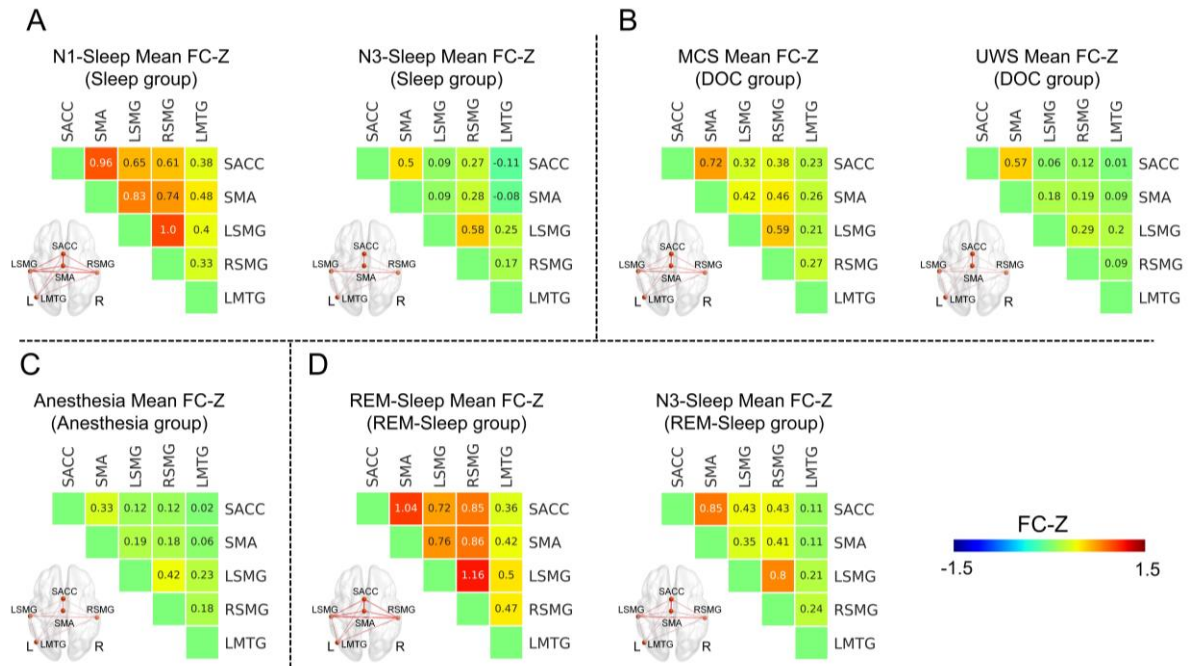

Supplementary fig. 5. ROI-based functional connectivity in altered conscious states. (A) The mean of functional connectivity z-values of N1-sleep and N3-sleep states in sleep group. (B) The mean of functional connectivity z-values of MCS and UWS in DOC group. (C) The mean of functional connectivity z-values of anesthesia state. (D) The mean of functional connectivity z-values of REM-sleep and N3-sleep states in REM-sleep group. SACC = supragenual anterior cingulate cortex; SMA = supplementary motor area; LSMG = left supramarginal gyrus; RSMG = right supramarginal gyrus; LMTG = left middle temporal gyrus.



Supplementary fig. 6

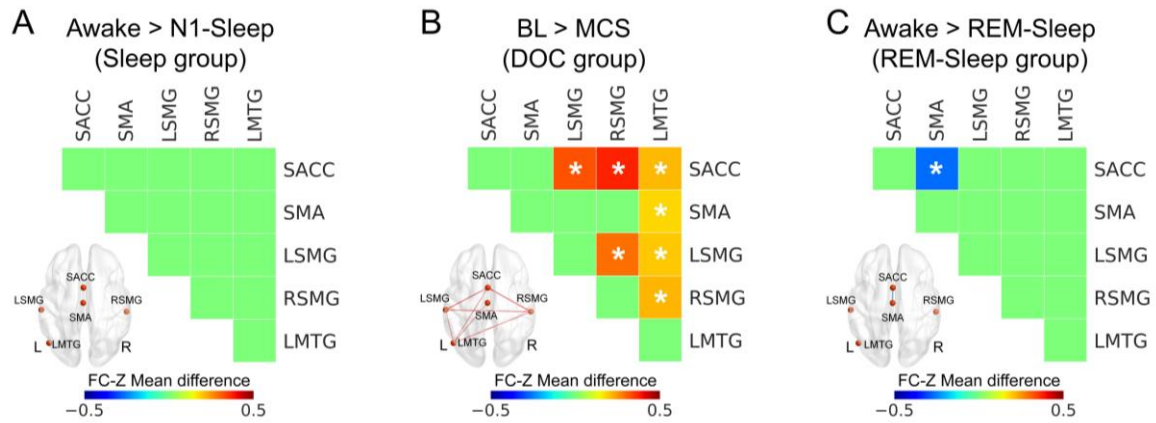

Supplementary fig. 6. The functional connectivity difference between different conscious states. (A) No difference between awake and N1-sleep in sleep group. (B) The difference between BL and MCS in DOC group. (C) The difference between awake and REM-sleep in REM-sleep group. \* means  $p < 0.05$  FDR corrected. SACC = supragenual anterior cingulate cortex; SMA = supplementary motor area; LSMG = left supramarginal gyrus; RSMG = right supramarginal gyrus; LMTG = left middle temporal gyrus.

Supplementary fig. 7

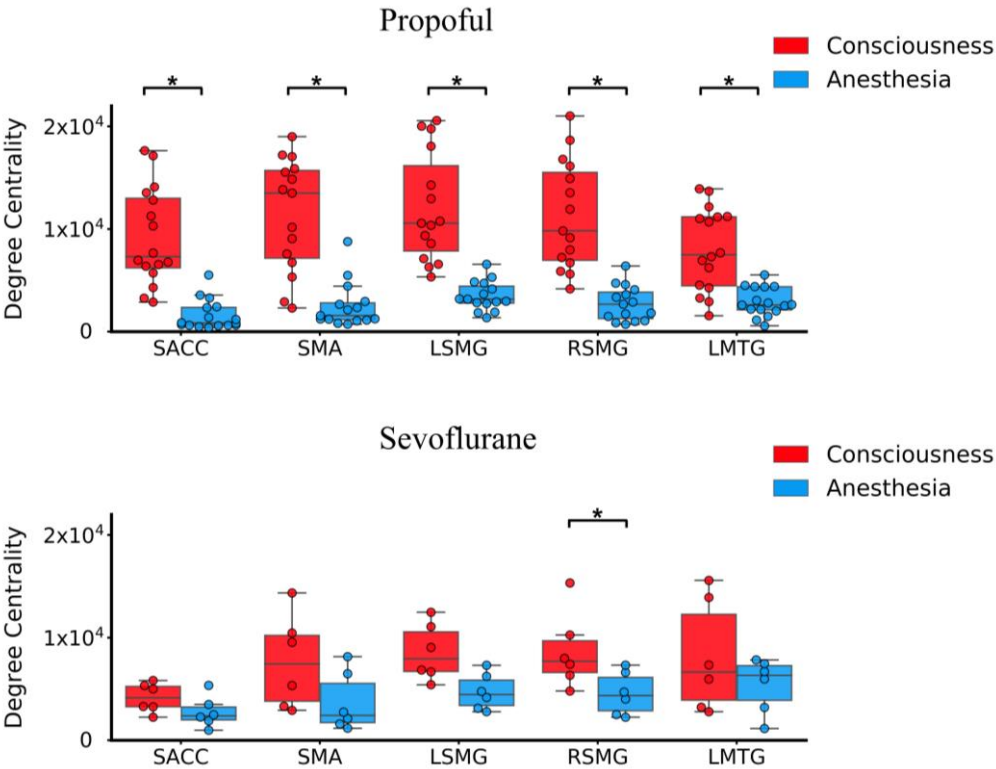

Supplementary fig. 7. The degree centrality for participants adopting Propofol and Sevoflurane. SACC = supragenual anterior cingulate cortex; SMA = supplementary motor area; LSMG = left supramarginal gyrus; RSMG = right supramarginal gyrus; LMTG = left middle temporal gyrus. \* means  $p < 0.05$  FDR corrected.

All data needed to evaluate the conclusions in the paper are present in the paper and the Supplementary Materials. Additional data related to this paper may be requested from the corresponding author.
